# Supplementary material for: DNA–TCP complex structures reveal a unique recognition mechanism for TCP transcription factor families
Source: PubMed Central journal article supplement — Nucleic Acids Res. 2022 Dec 22;51(1):434–48. doi: 10.1093/nar/gkac1171 (PMC9841405; doi:10.1093/nar/gkac1171), 2022-12-22
Supplement: gkac1171_supplemental_file.pdf [file gkac1171_supplemental_file.pdf]

## Supplementary Information

### **DNA–TCP complex structures reveal a unique recognition mechanism for TCP transcription factor families**

Yi Zhang<sup>1</sup>, Yong-ping Xu<sup>1</sup>, Ju-kui Nie<sup>1</sup>, Hong Chen<sup>1</sup>, Genji Qin<sup>1</sup>, Bo Wang<sup>1</sup>, and  
Xiao-Dong Su<sup>1, \*</sup>

<sup>1</sup> State Key Laboratory of Protein and Plant Gene Research, School of Life Sciences,  
and Biomedical Pioneering Innovation Center (BIOPIC), Peking University, Beijing,  
100871, China.

\* Lead contact

\* Correspondence and requests for materials should be addressed to X-D. S (email:  
[xdsu@pku.edu.cn](mailto:xdsu@pku.edu.cn)).

Contents

Supplementary Table 1-2

Supplementary Figure 1-9

**Supplementary Table 1. Data collection and refinement statistics.**

|                                        | TCP10-49M&<br>12bp<br>class II DNA | TCP10-DBD&<br>three-site<br>class II DNA | TCP10-DBD&<br>one-site<br>class II DNA | TCP10-DBD&<br>two-site<br>class II DNA | TCP10-DBD&<br>1M<br>class II DNA |
|----------------------------------------|------------------------------------|------------------------------------------|----------------------------------------|----------------------------------------|----------------------------------|
| <b>Data Collection Statistics</b>      |                                    |                                          |                                        |                                        |                                  |
| Space Group                            | P6 <sub>1</sub> 22                 | C2                                       | P3 <sub>2</sub> 21                     | P2 <sub>1</sub>                        | P2 <sub>1</sub>                  |
| Wavelength (Å)                         | 1.1000                             | 0.9792                                   | 1.0800                                 | 1.0800                                 | 1.0800                           |
| Number of Reflections                  | 258574 (25559)                     | 119561(9705)                             | 171649 (15391)                         | 123838(11594)                          | 119391(12397)                    |
| Cell dimensions                        |                                    |                                          |                                        |                                        |                                  |
| a, b, c (Å)                            | 68.1 68.1 210.8                    | 74.6 76.8 46.0                           | 78.8 78.8 82.8                         | 78.8 76.9 83.1                         | 78.6 76.9 83.2                   |
| $\alpha$ , $\beta$ , $\gamma$ (°)      | 90.0 90.0 120.0                    | 90.0 103.6 90.0                          | 90.0 90.0 120.0                        | 90.0 113.9 90.0                        | 90.0 113.7 90.0                  |
| Resolution (Å)                         | 29.21 - 2.90<br>(3.01 - 2.90)      | 44.72 - 1.92<br>(1.99 - 1.92)            | 35.56-2.65<br>(2.75-2.65)              | 29.10-2.99<br>(3.10-2.99)              | 29.16-3.04<br>(3.15-3.04)        |
| Rmerge (%)                             | 11.7 (61.5)                        | 10.3 (43.4)                              | 9.0 (81.4)                             | 16.5 (76.6)                            | 10.0 (46.2)                      |
| CC <sub>1/2</sub>                      | 0.999 (0.975)                      | 0.996 (0.866)                            | 0.999 (0.978)                          | 0.986 (0.754)                          | 0.997 (0.867)                    |
| I/ $\sigma$ (I)                        | 38.8 (8.9)                         | 13.7 (2.2)                               | 27.6 (2.82)                            | 8.8 (2.8)                              | 14.5 (4.7)                       |
| Completeness (%)                       | 99.5 (97.0)                        | 99.8 (98.6)                              | 96.4 (68.0)                            | 96.8 (77.9)                            | 97.1 (86.1)                      |
| Multiplicity                           | 37.0 (39.1)                        | 6.2 (5.1)                                | 19.2(17.9)                             | 6.7 (6.9)                              | 6.8 (7.2)                        |
| Wilson B-factor                        | 52.17                              | 29.39                                    | 39.81                                  | 63.86                                  | 69.73                            |
| <b>Refinement Statistics</b>           |                                    |                                          |                                        |                                        |                                  |
| Reflections used in refinement         | 6982 (653)                         | 19272 (1888)                             | 8616 (586)                             | 17928 (1428)                           | 17178 (1515)                     |
| Reflections used for R <sub>free</sub> | 699 (65)                           | 1928 (189)                               | 862 (57)                               | 1783 (145)                             | 1732 (154)                       |
| R <sub>work</sub> /R <sub>free</sub> % | 0.18/0.24<br>(0.19/0.26)           | 0.18/0.21<br>(0.27/0.35)                 | 0.21/0.25<br>(0.32/0.34)               | 0.21/0.27<br>(0.30/0.39)               | 0.21/0.26<br>(0.27/0.34)         |
| No. non-hydrogen atoms                 | 1442                               | 1826                                     | 1323                                   | 4487                                   | 4779                             |
| Macromolecules                         | 1442                               | 1712                                     | 1323                                   | 4487                                   | 4779                             |
| Solvent                                | -                                  | 114                                      | -                                      | -                                      | -                                |
| Protein residues                       | 119                                | 141                                      | 102                                    | 370                                    | 391                              |
| B factor (Å <sup>2</sup> )             |                                    |                                          |                                        |                                        |                                  |
| Protein                                | 49.73                              | 34.56                                    | 41.06                                  | 59.05                                  | 67.37                            |
| Solvent                                | -                                  | 37.25                                    | -                                      | -                                      | -                                |
| R.m.s deviations                       |                                    |                                          |                                        |                                        |                                  |
| Bond Lengths (Å)                       | 0.008                              | 0.008                                    | 0.011                                  | 0.011                                  | 0.012                            |
| Bond Angles (°)                        | 0.94                               | 1.02                                     | 1.07                                   | 1.12                                   | 1.19                             |
| Ranachandran (%)                       |                                    |                                          |                                        |                                        |                                  |
| Preferred region                       | 96.46                              | 100.00                                   | 97.96                                  | 95.25                                  | 93.83                            |
| Allowed region                         | 3.54                               | 0.00                                     | 2.04                                   | 4.75                                   | 6.17                             |
| Outliers                               | 0.00                               | 0.00                                     | 0.00                                   | 0.00                                   | 0.00                             |

|                                        | TCP15-DBD                                     | TCP15-DBD&<br>12bp<br>class I DNA             |
|----------------------------------------|-----------------------------------------------|-----------------------------------------------|
| <b>Data Collection Statistics</b>      |                                               |                                               |
| Space Group                            | P2 <sub>1</sub> 2 <sub>1</sub> 2 <sub>1</sub> | P2 <sub>1</sub> 2 <sub>1</sub> 2 <sub>1</sub> |
| Wavelength (Å)                         | 1.1000                                        | 0.9792                                        |
| Number of Reflections                  | 89783 (8355)                                  | 667441 (64406)                                |
| Cell dimensions                        |                                               |                                               |
| a, b, c (Å)                            | 26.6 51.6 71.5                                | 71.2 112.8 156.8                              |
| α, β, γ (°)                            | 90.0 90.0 90.0                                | 90.0 90.0 90.0                                |
| Resolution (Å)                         | 19.72 – 2.00<br>(2.07 – 2.00)                 | 18.05-3.00<br>(3.11-3.00)                     |
| Rmerge (%)                             | 15.2 (115.6)                                  | 26.0 (83.4)                                   |
| CC <sub>1/2</sub>                      | 0.998 (0.861)                                 | 0.998 (0.994)                                 |
| I/σ (I)                                | 14.2 (2.1)                                    | 19.25 (3.62)                                  |
| Completeness (%)                       | 99.8 (100)                                    | 93.3 (71.9)                                   |
| Multiplicity                           | 12.8 (12.8)                                   | 25.9 (25.3)                                   |
| Wilson B-factor                        | 26.47                                         | 68.33                                         |
| <b>Refinement Statistics</b>           |                                               |                                               |
| Reflections used in refinement         | 7075 (693)                                    | 24198 (1832)                                  |
| Reflections used for R <sub>free</sub> | 708 (69)                                      | 1210 (111)                                    |
| R <sub>work</sub> /R <sub>free</sub> % | 0.18/0.22<br>(0.22/0.31)                      | 0.20/0.25<br>(0.30/0.39)                      |
| No. non-hydrogen atoms                 | 728                                           | 5399                                          |
| Macromolecules                         | 708                                           | 5399                                          |
| Solvent                                | 20                                            | -                                             |
| Protein residues                       | 92                                            | 475                                           |
| B factor (Å <sup>2</sup> )             |                                               |                                               |
| Protein                                | 34.69                                         | 60.84                                         |
| Solvent                                | 36.48                                         | -                                             |
| R.m.s deviations                       |                                               |                                               |
| Bond Lengths (Å)                       | 0.009                                         | 0.012                                         |
| Bond Angles (°)                        | 0.96                                          | 1.16                                          |
| Ranachandran (%)                       |                                               |                                               |
| Preferred region                       | 96.59                                         | 94.55                                         |
| Allowed region                         | 3.41                                          | 5.45                                          |
| Outliers                               | 0.00                                          | 0.00                                          |

Values in bracket indicate those of the highest resolution shell.

**Supplementary Table 2. DNA sequences used in each assay.**

| class II DNA                                   | Sequence                          |                         |
|------------------------------------------------|-----------------------------------|-------------------------|
| three-site class II DNA                        | 5'-AT <u>GTGGTCCCCAC</u> T-3'     | 3'-A CACCAGGGGTG AT-5'  |
| two-site class II DNA                          | 5'-AT <u>GTGGTCCCGTG</u> T-3'     | 3'-A CACCAGGGCAC AT-5'  |
| one-site class II DNA                          | 5'-AT AGAG <u>TCCCGTG</u> T-3'    | 3'-A TCTCAGGGCAC AT-5'  |
| one-site class II DNA<br>(for crystallization) | 5'-GAG <u>GCCCCCCC</u> CATAATA-3' | 3'-TCTCCGGGGGGGTATTA-5' |
| 1M class II DNA                                | 5'-AT <u>GTGGTCCCCAG</u> T-3'     | 3'-A CACCAGGGCAC AT-5'  |
| 12 bp class II DNA                             | 5'-AT <u>GTGGTCCCC</u> -3'        | 3'-A CACCAGGGG T-5'     |

| class I DNA            | Sequence                        |                        |
|------------------------|---------------------------------|------------------------|
| three-site class I DNA | 5'-AT <u>GTGGGTCCCAC</u> T-3'   | 3'-A CACCCAGGGTG AT-5' |
| two-site class I DNA   | 5'-AT <u>GTGGGTCCCGTG</u> T-3'  | 3'-A CACCCAGGCAC AT-5' |
| one-site class I DNA   | 5'-AT AGAG <u>GTCCCGTG</u> T-3' | 3'-A TCTCCAGGCAC AT-5' |
| 12 bp class I DNA      | 5'-AT <u>GTGGGTCCCC</u> -3'     | 3'-A CACCCAGGGG T-5'   |

| Non-specific DNA | Sequence                |                         |
|------------------|-------------------------|-------------------------|
| 1#               | 5'- AT ACTAAAAATGT T-3' | 3'-A TGATTTTTTACAA T-5' |
| 2#               | 5'- AT ACAAAAAAAGT T-3' | 3'-A TGTTTTTTTCAA T-5'  |

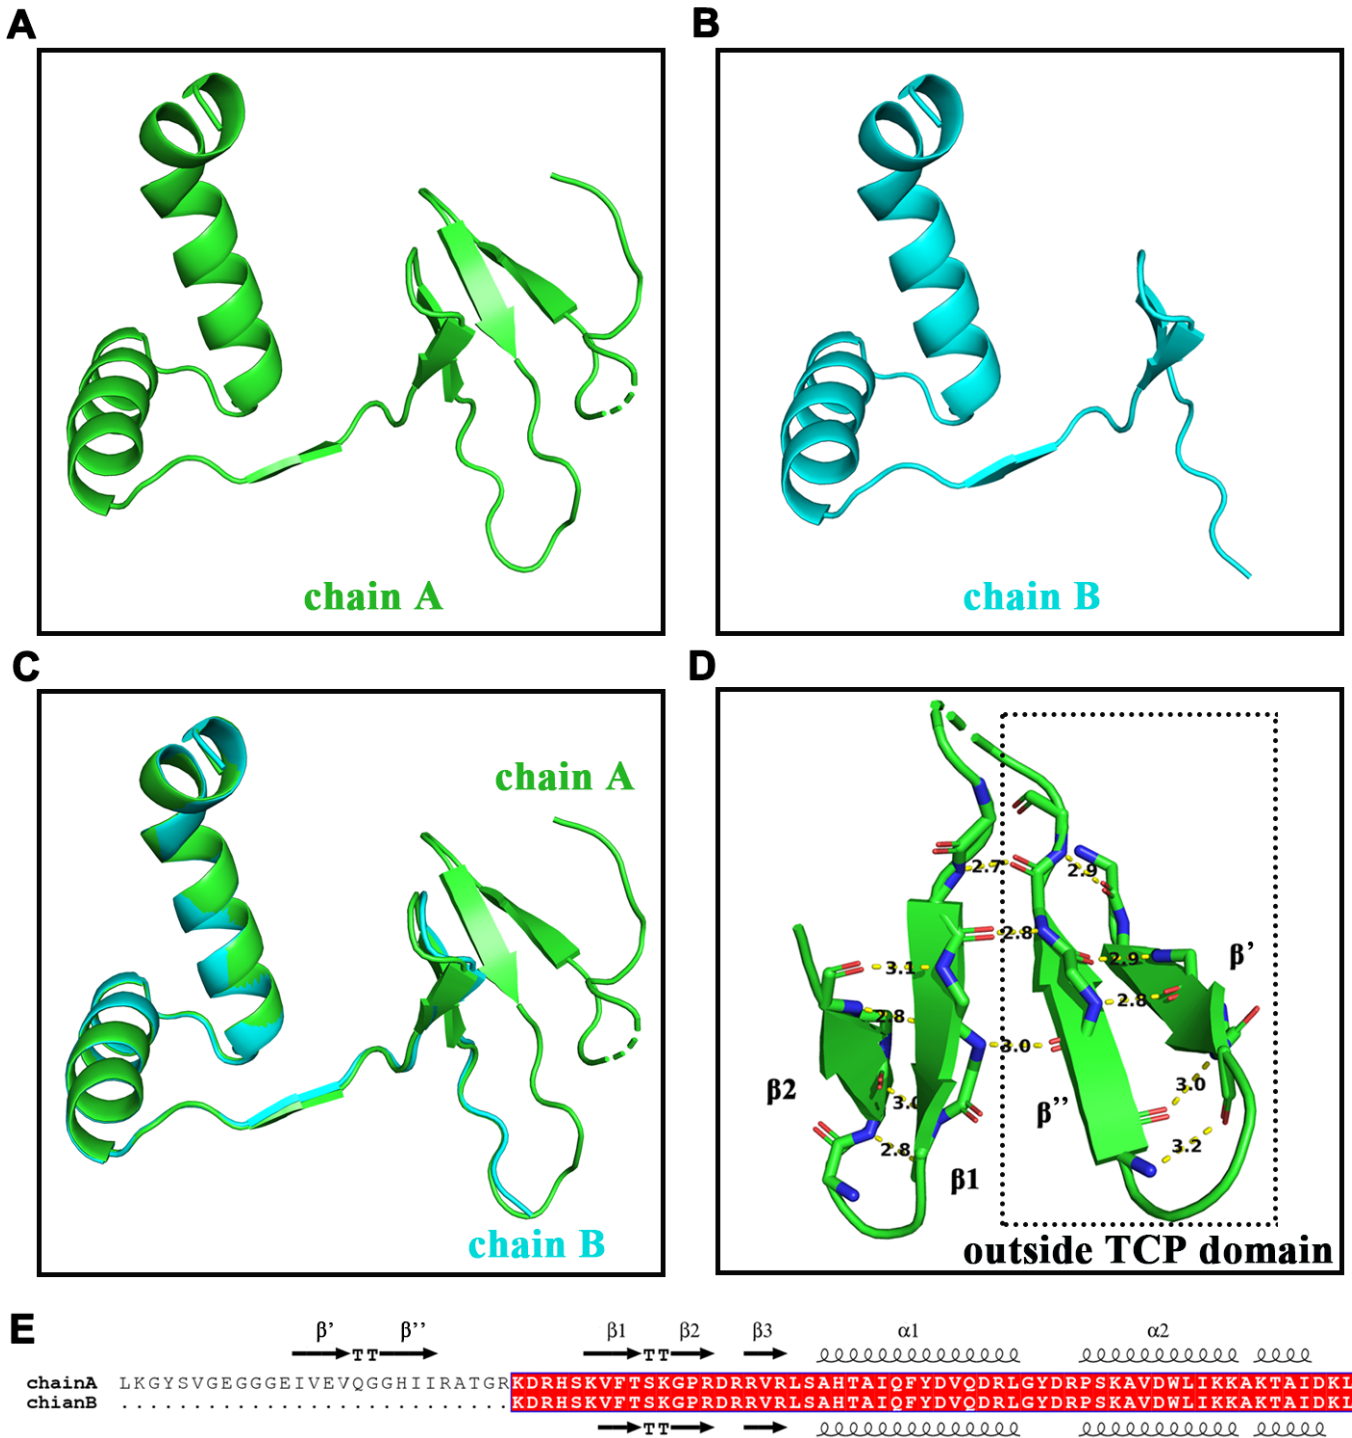

**Supplementary Figure 1. Structure alignment of chain A and chain B of AtTCP10-DBD.**

A–C, Structure alignment of chain A (green) & chain B (cyan) of AtTCP10-DBD. Chain A has 27 amino acids more than chain B in the N-terminal, forming two  $\beta$  strands ( $\beta'$  and  $\beta''$ ).

D, The  $\beta$  sheet formed by  $\beta'$ ,  $\beta''$ ,  $\beta 1$  and  $\beta 2$  in chain A.

E, Sequence alignment of chain A & chain B of AtTCP10-DBD.

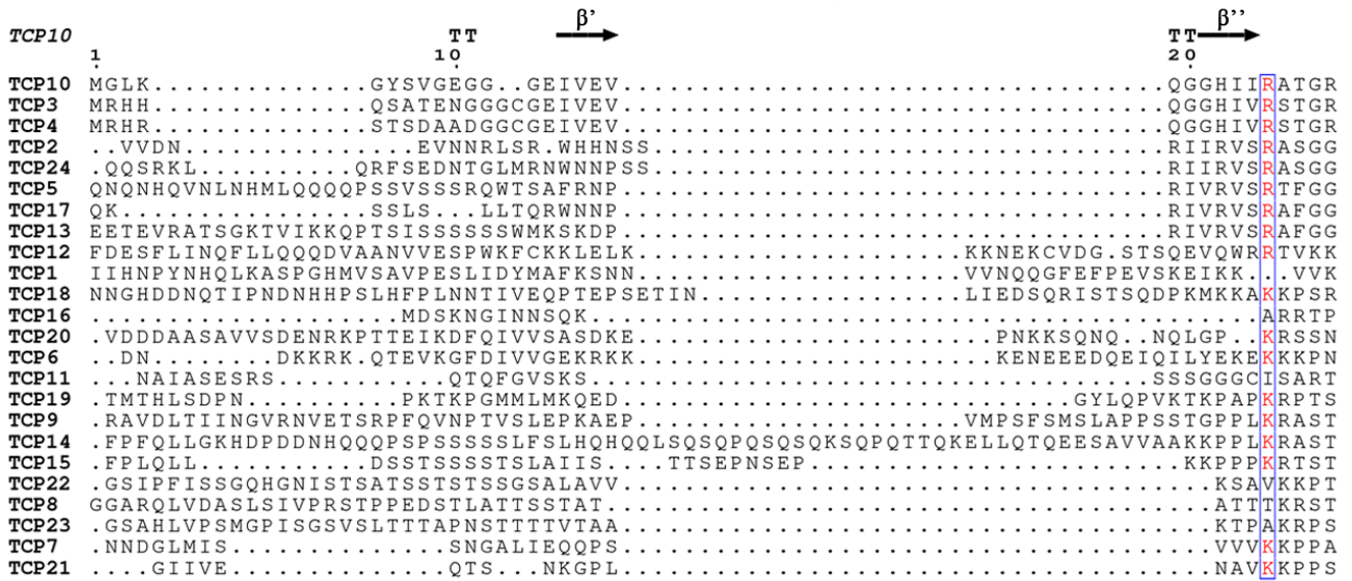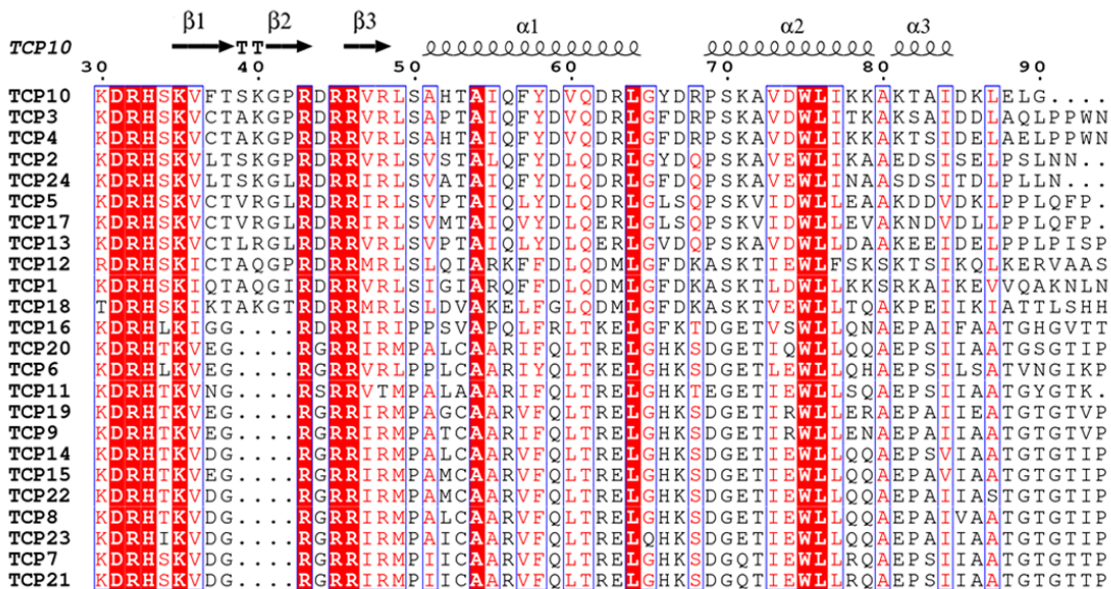

## Supplementary Figure 2. Sequence alignments of AtTCP10 (residue 1–90) with other 23 members.

Besides β1–β3 and α1–α2, there are two more β strands (β' and β'') in the structure. From sequence conservation, the β' and β'' may only exist in the small branch of TCP10/TCP3/TCP4, other structural motif/topology may occur in other subfamilies.

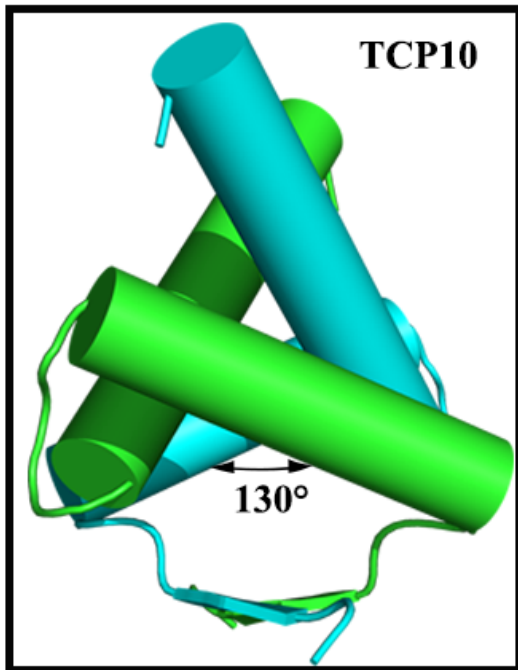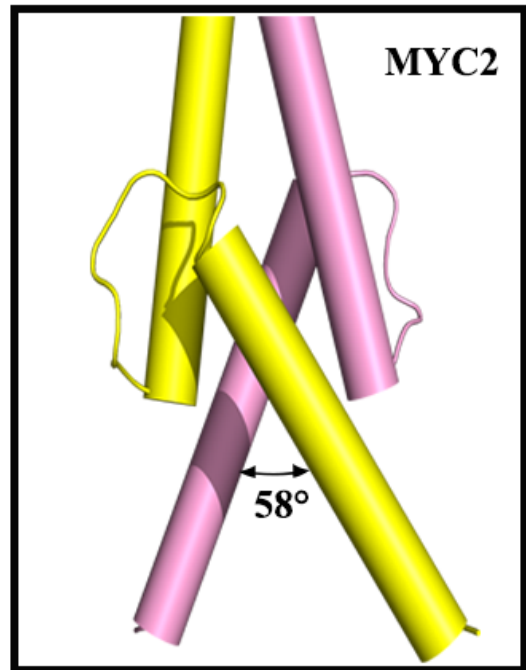

**Supplementary Figure 3. Comparison of TCP domain with bHLH domain.**

Comparison of the tilt angles of two  $\alpha 1$  helices between TCP10 and canonical bHLH protein (MYC2).

**A** RVR saddle

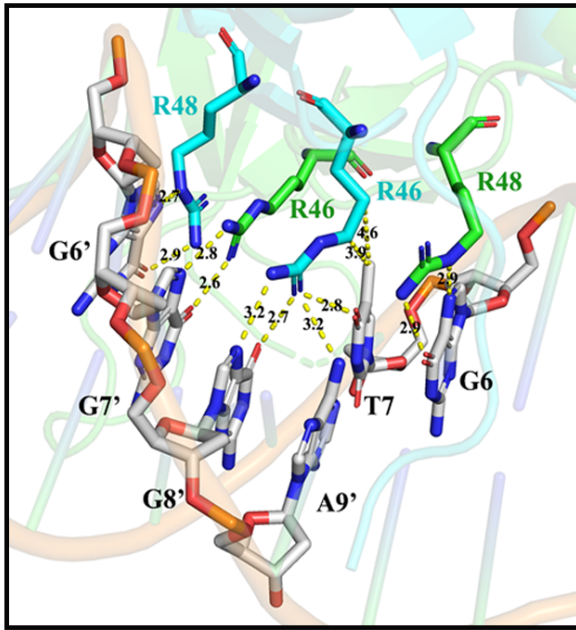

**C** RIR saddle

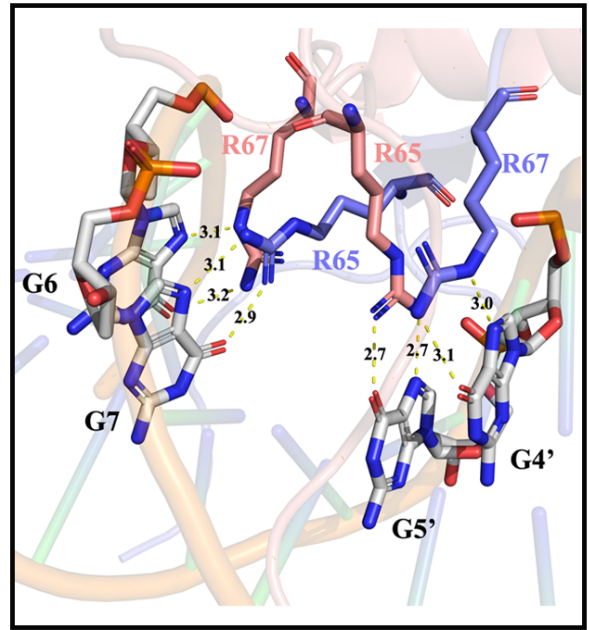

**B** DRH loop

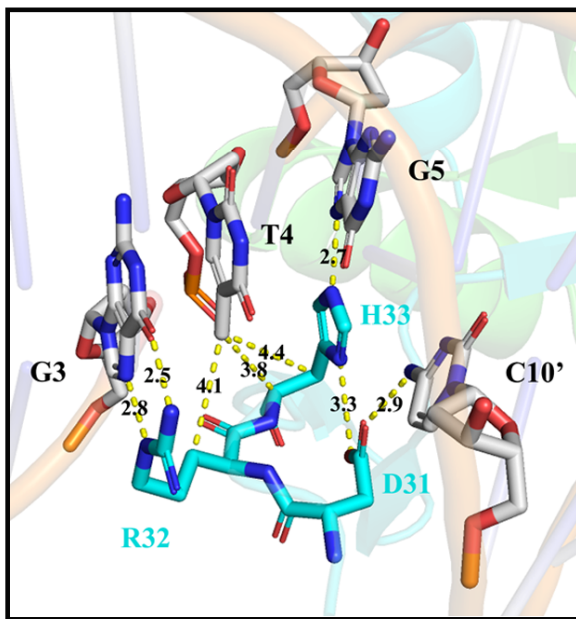

**D** DRH loop

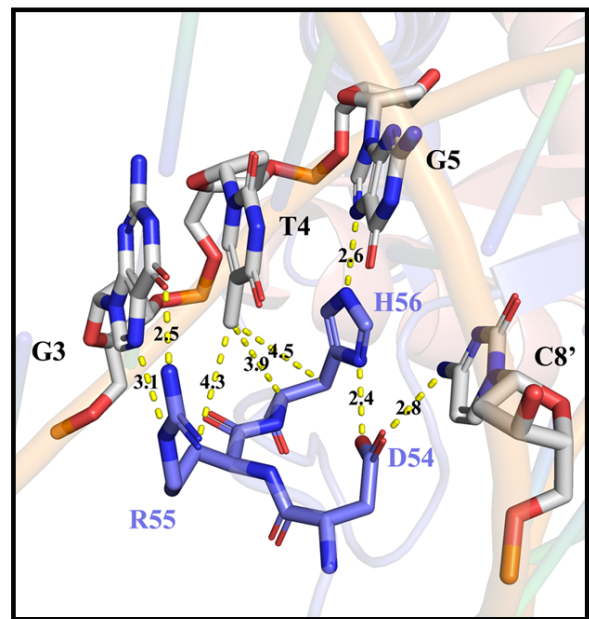



#### **Supplementary Figure 4. The details of interactions in AtTCP10-DBD complex and AtTCP15-DBD complex.**

**A**, Base-specific interactions in the RVR saddle of AtTCP10-DBD complex are shown as follows: Arg<sup>46A</sup> (green), Arg<sup>48A</sup> (green) and Arg<sup>48B</sup> (cyan) recognize G7', G6 and G6' respectively. Arg<sup>46B</sup> (cyan) recognizes T7, G8' and A9'. Among these base-specific interactions, the following hydrogen bonds play important roles: the side chain nitrogen of Arg<sup>48</sup> with O6 and N7 of G6 and G6'; the guanidyl of Arg<sup>46A</sup> with O6 and N7 of G7'; the guanidyl of Arg<sup>46B</sup> with O6 and N7 of G8'; the NH<sub>2</sub><sup>+</sup> group of Arg<sup>46B</sup> with the hydroxyl of A9' and O4 of T7. Furthermore, Arg<sup>46B</sup> also forms hydrophobic interactions with the T7 methyl group.

**B**, Interactions in one of the DRH loops of AtTCP10-DBD complex are shown as follows: Asp<sup>31</sup> recognizes C10'; Arg<sup>32</sup> recognizes G3 and T4; and His<sup>33</sup> recognizes G5 and T4. Asp<sup>31</sup> also interacts with His<sup>33</sup>. The following bonds play important roles: the carboxyl group of Asp<sup>31</sup> with the amino groups of C10 and C10'; Arg<sup>32</sup> with G3 and G3'; the imidazole group of His<sup>33</sup> with G5 and G5'. The side chains of Arg<sup>32</sup> and His<sup>33</sup> also form hydrophobic interactions with the methyl groups of T4 and T4'.

**C**, Base-specific interactions in the RIR saddle of AtTCP15-DBD complex are shown as follows: Arg<sup>67A</sup> (pink), Arg<sup>67B</sup> (slate), Arg<sup>65A</sup> (pink) and Arg<sup>65B</sup> (slate) recognize G6, G4', G7 and G5' respectively.

**D**, Interactions in one of the DRH loops of AtTCP15-DBD complex are shown as follows: Asp<sup>54</sup> recognizes C8'; Arg<sup>55</sup> recognizes G3 and T4; and His<sup>56</sup> recognizes G5 and T4. Asp<sup>54</sup> also interacts with His<sup>56</sup>.

The distances (Å) of all the hydrogen bonds and hydrophobic interactions with bases are shown.

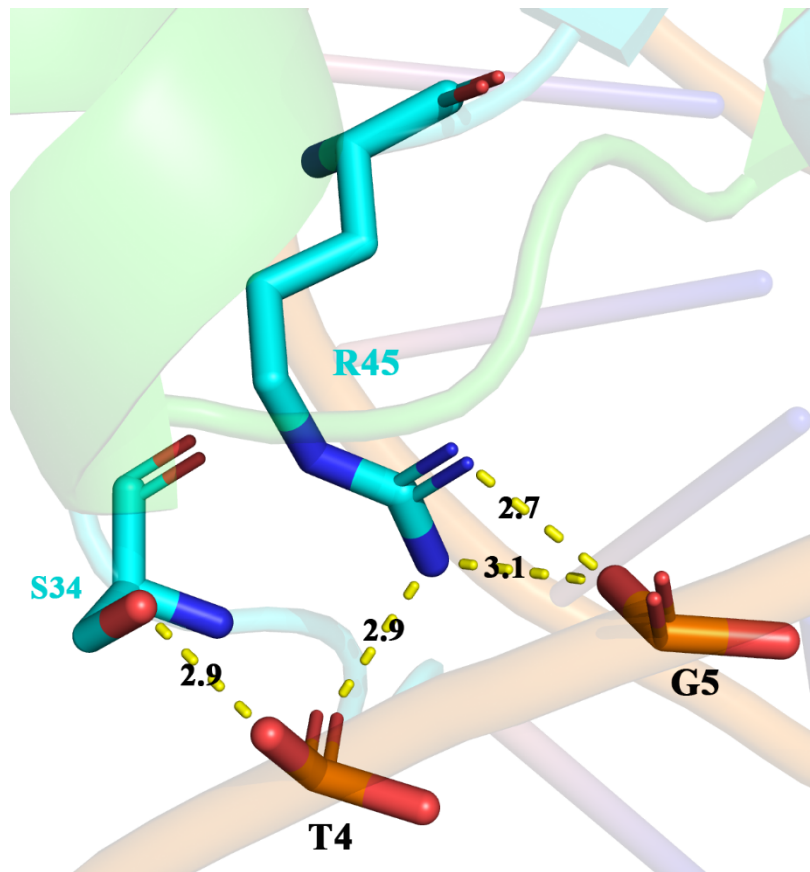

**Supplementary Figure 5. The interactions between protein residues and DNA backbone.**

Arg<sup>45</sup> has electrostatic interactions with T4 & T4' and G5 & G5'. H-bonds include Arg<sup>45</sup> to T4 & T4' and G5 & G5', Ser34 to T4 & T4'

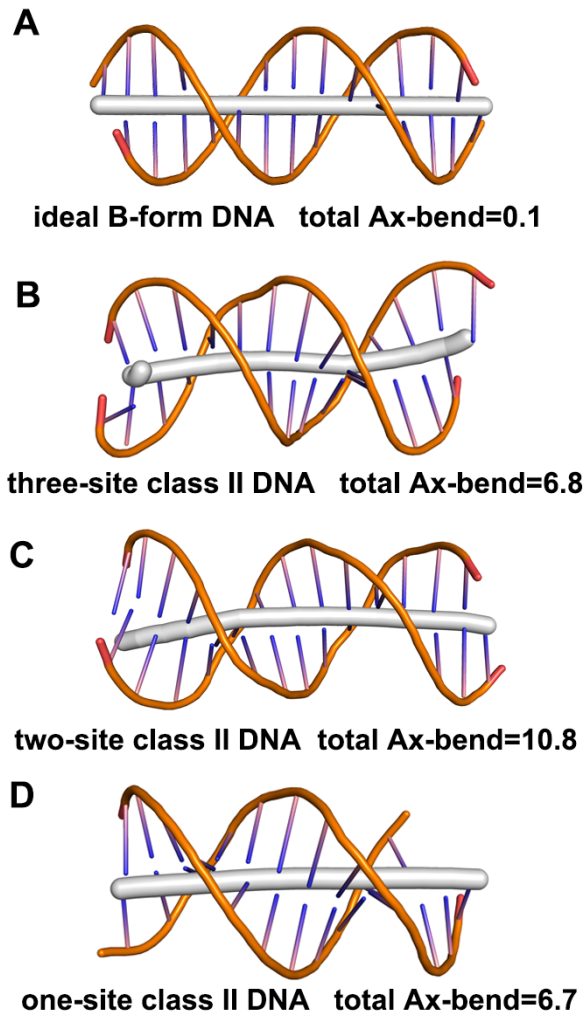

**Supplementary Figure 6. The helical axis and the total value of Ax-bend of ideal B-form DNA and bound class II three-site, two-site, one-site DNA.**

The helical axis and the total value of Ax-bend (the angle between axes of the DNA helix in two adjacent base pairs) of (A) ideal B-form DNA and (B) three-site class II DNA, (C) two-site class II DNA, (D) one-site class II DNA from complex structures.

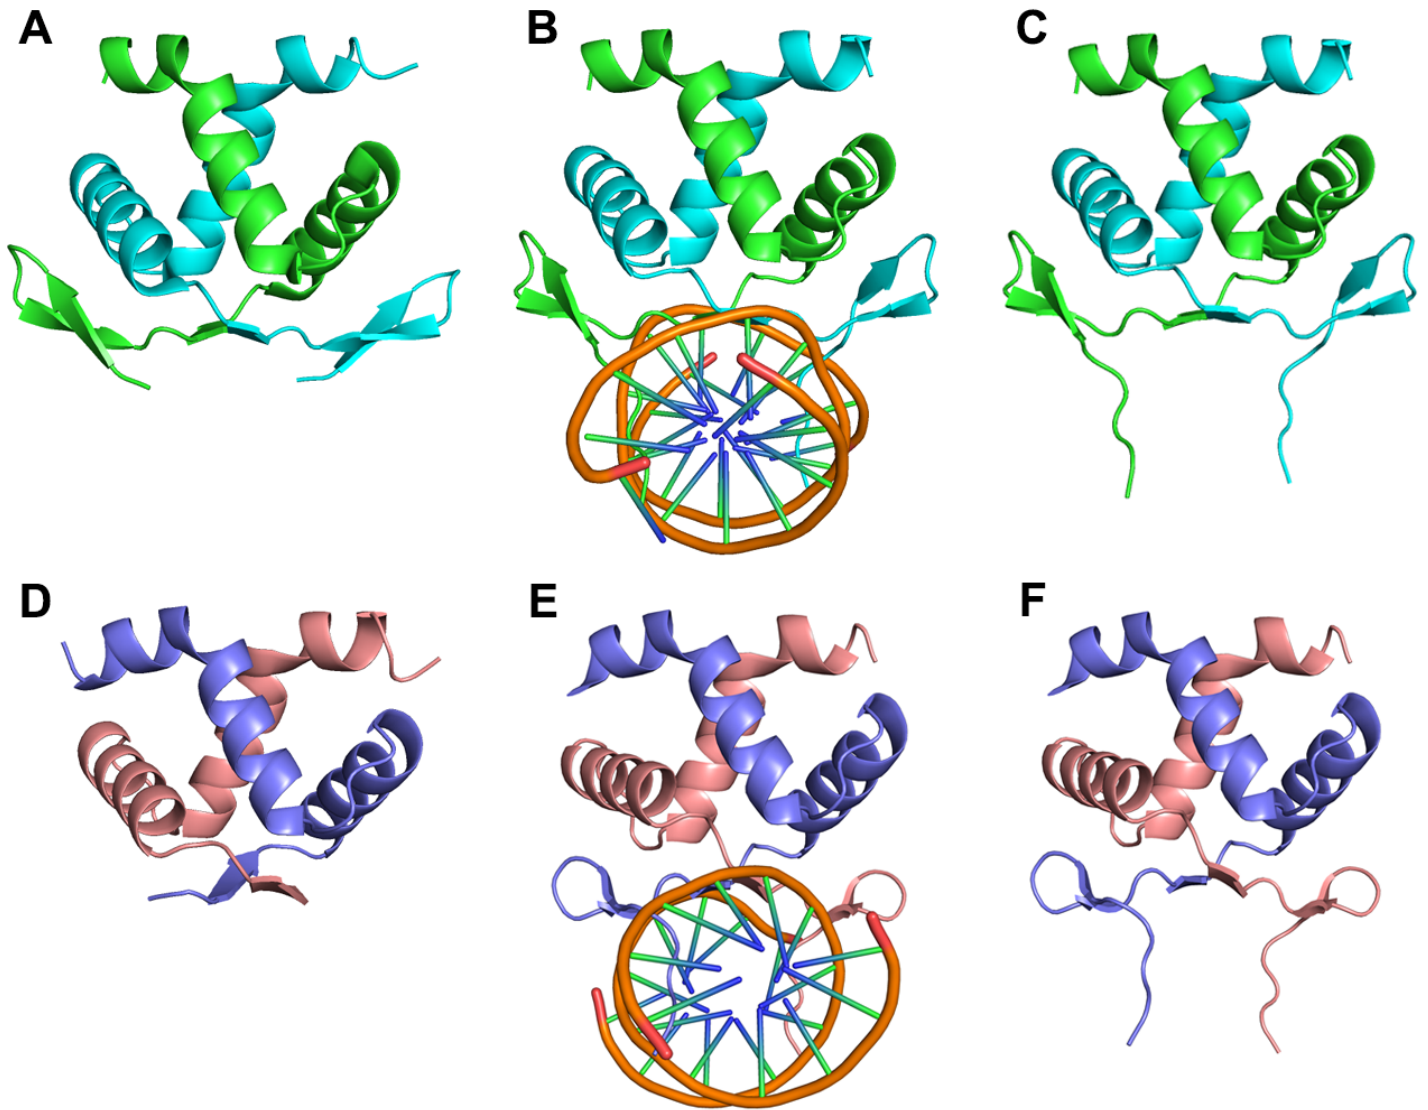

**Supplementary Figure 7. Comparison of the class II and class I TCP domain in the apo form and in complex with DNA.**

**A–C,** The apo structure of class II OsPCF6 (5zkt), the complex structure of class II AtTCP10-DBD with DNA, and the complex structure without DNA

**D–F,** The apo structure of class I AtTCP15-DBD, the complex structure of class I AtTCP15-DBD with DNA, and the complex structure without DNA

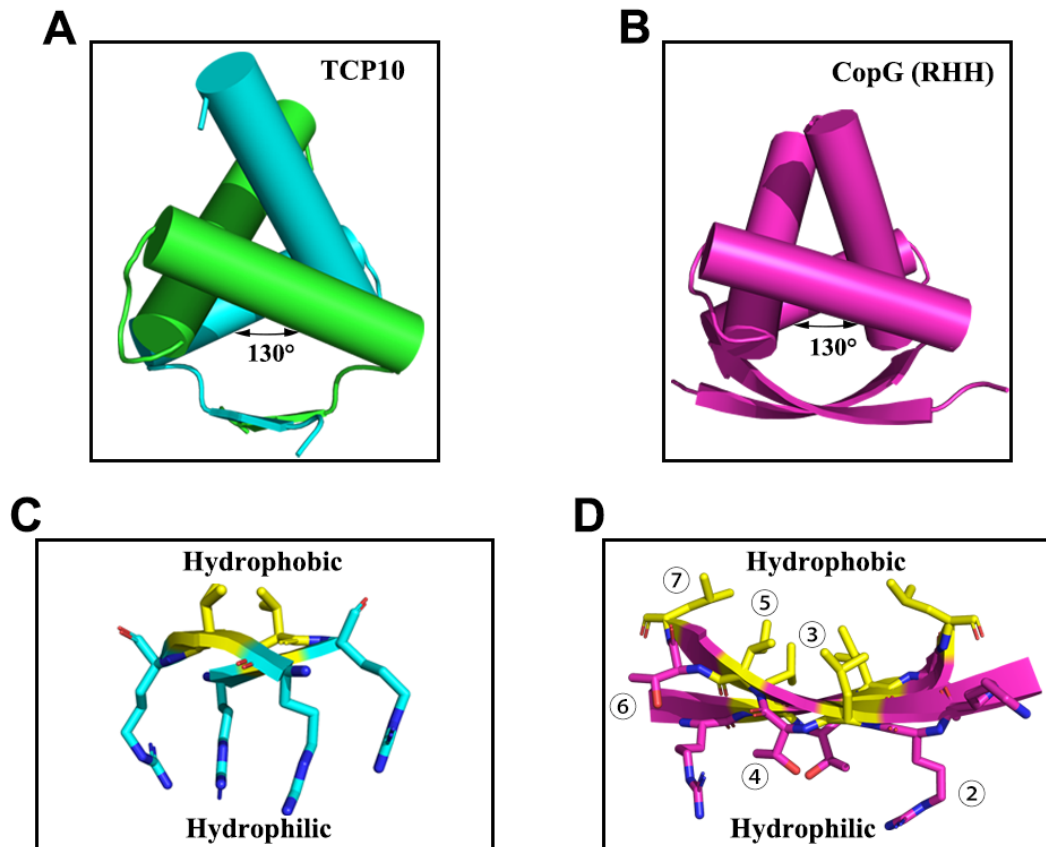

**Supplementary Figure 8. Comparison of the TCP domains with RHH domains**

**A–B**, Comparison of the tilt angles of the two  $\alpha 1$  helices in the AtTCP10-DBD and bacterial RHH domains (GopG).

**C–D**, The  $\beta$ -sheet interacting with DNA in the TCP domain of AtTCP10-DBD and RHH domain. (C) In the TCP domain of TCP10, the  $\beta 3$  strand is shorter, and the side chain of valine (yellow) is oriented toward the hydrophobic core while the side chains of arginine (positions 46 and 48) interact with the DNA; (D) In the bacterial RHH domain, residues ③, ⑤, ⑦ in the  $\beta$ -sheet with hydrophobic side chains (yellow) are oriented toward the hydrophobic core. Residues ②, ④, ⑥ are oriented toward away from the core and interact with the DNA nucleotides.

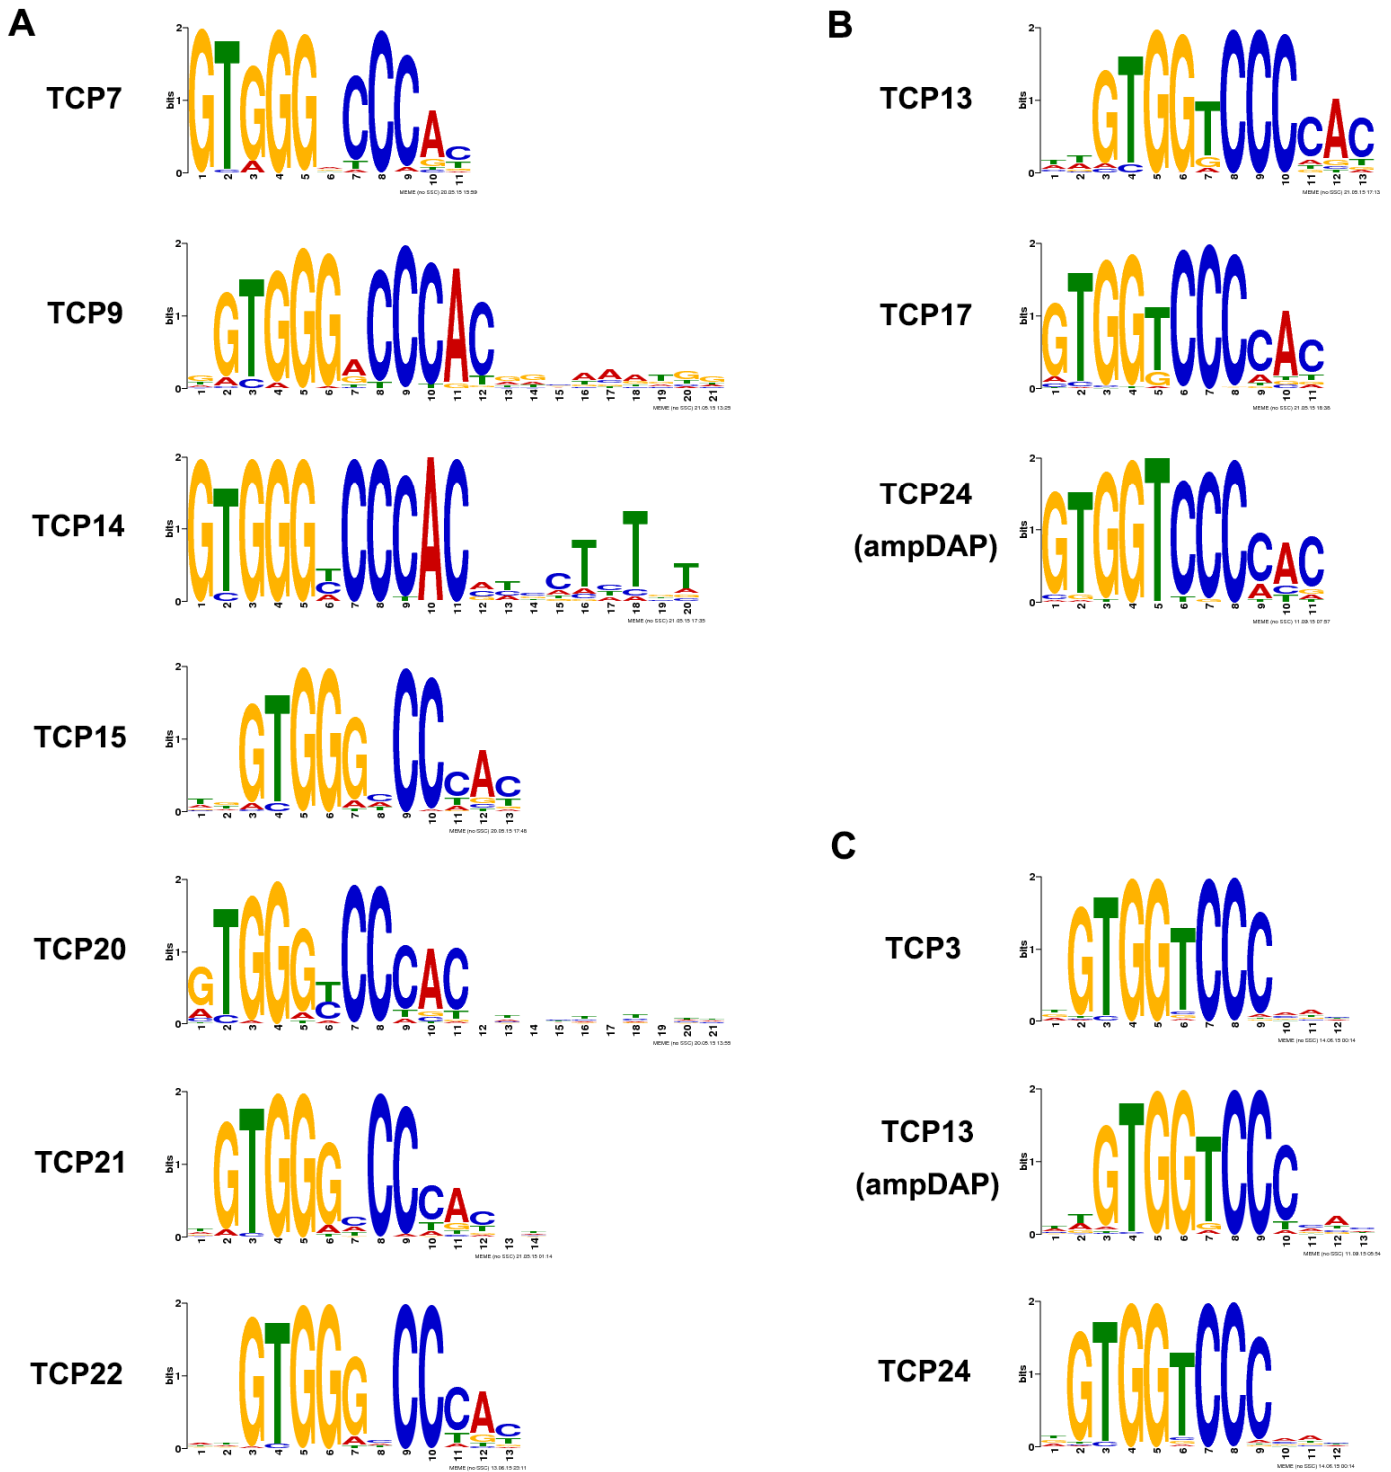

**Supplementary Figure 9. DAP-seq and ampDAP-seq results of TCP proteins.**

A, DAP-seq results of class I TCP proteins AtTCP7, AtTCP9, AtTCP14, AtTCP15, AtTCP20, AtTCP21 and AtTCP22 show the binding motif for class I TCPs is GTGGGNCCCAC.

B, DAP-seq results of class II TCP proteins AtTCP13 and AtTCP17 and ampDAP-seq result of AtTCP24 show the binding motif for class II TCPs is GTGGTCCCCAC.

C, DAP-seq results of class II TCP proteins AtTCP3 and AtTCP24 and ampDAP-seq result of AtTCP13 show the binding motif for class II TCPs is GTGGTCCC.
